# Supplementary material for: Cr (III) Removal Capacity in Aqueous Solution in Relation to the Functional Groups Present in the Orange Peel (Citrus sinensis)
Source: MDPI journal article supplement (doi:10.3390/app11146346), 2021-07-08
Supplement: s1 [file s1]

## Supplementary Materials: Cr (III) Removal Capacity in Aqueous Solution in Relation to the Functional Groups Present in the Orange Peel (Citrus Sinensis)

Laura Patiño-Saldivar, José A. Hernández, Alba Ardila, Mercedes Salazar-Hernández, Alfonso Talavera and Rosa Hernández-Soto

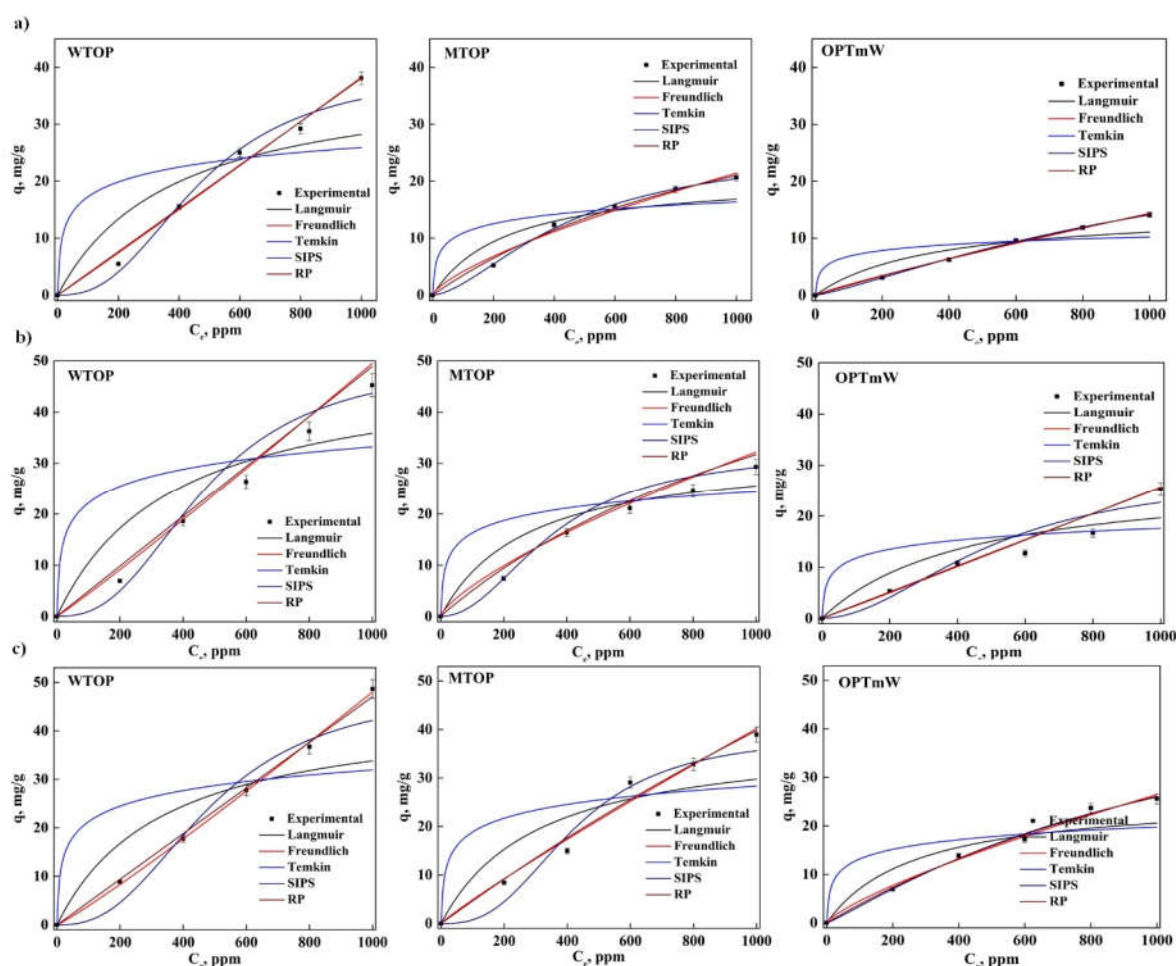

**Figure S1.** Adjustment of experimental data with the adsorption isotherms of WTOP, MTOP and OPTmW with different pH, a) 0.91, b) 1.78 y c) 2.72.

**Table S1.** Kinetic data of Cr (III) removal using WTOP.

| Model       | Parameter      | 4 g/L |       |       | 8 g/L |       |       | 12 g/L |       |       | 16 g/L |       |       | 20 g/L |        |       |
|-------------|----------------|-------|-------|-------|-------|-------|-------|--------|-------|-------|--------|-------|-------|--------|--------|-------|
|             |                | 0.91  | 1.78  | 2.72  | 0.91  | 1.78  | 2.72  | 0.91   | 1.78  | 2.72  | 0.91   | 1.78  | 2.72  | 0.91   | 1.78   | 2.72  |
| PFO         | $q_{\max}$     | 35.26 | 46.09 | 57.83 | 49.58 | 30.22 | 32.79 | 28.05  | 23.78 | 27.83 | 15.77  | 19.11 | 21.60 | 13.85  | 21.28  | 16.50 |
|             | $k_1$          | 0.262 | 0.392 | 0.343 | 0.071 | 0.604 | 0.973 | 0.096  | 0.309 | 0.457 | 0.115  | 0.237 | 0.364 | 0.079  | 0.124  | 0.432 |
|             | $R^2$          | 0.915 | 0.989 | 0.989 | 0.991 | 0.969 | 0.946 | 0.984  | 0.992 | 0.981 | 0.996  | 0.988 | 0.983 | 0.984  | 0.988  | 0.977 |
|             | $\Delta q, \%$ | 3.132 | 0.663 | 3.329 | 34.71 | 1.317 | 2.798 | 20.92  | 1.501 | 4.381 | 16.56  | 3.812 | 1.104 | 31.56  | 15.411 | 2.68  |
| PSO         | $q_{\max}$     | 40.22 | 46.00 | 54.01 | 50.00 | 32.00 | 34.01 | 25.00  | 22.01 | 24.01 | 11.55  | 18.01 | 20.01 | 8.003  | 15.01  | 14.01 |
|             | $k_2$          | 0.009 | 0.019 | 0.016 | 0.002 | 0.038 | 0.071 | 0.007  | 0.039 | 0.054 | 0.030  | 0.030 | 0.054 | 0.003  | 0.029  | 0.146 |
|             | $R^2$          | 0.862 | 0.930 | 0.899 | 0.978 | 0.979 | 0.961 | 0.953  | 0.904 | 0.943 | 0.920  | 0.920 | 0.921 | 0.849  | 0.850  | 0.805 |
|             | $\Delta q, \%$ | 1.396 | 0.592 | 0.607 | 35.32 | 0.693 | 1.506 | 14.80  | 1.251 | 1.416 | 2.676  | 1.548 | 5.368 | 3.339  | 0.446  | 3.244 |
| Elovic<br>h | $\alpha$       | 16.08 | 43.53 | 49.09 | 9.673 | 35.69 | 38.69 | 7.284  | 17.80 | 36.40 | 4.637  | 10.31 | 21.41 | 2.858  | 6.596  | 16.30 |
|             | $\beta$        | 0.061 | 0.074 | 0.057 | 0.094 | 0.112 | 0.093 | 0.141  | 0.138 | 0.156 | 0.228  | 0.161 | 0.162 | 0.293  | 0.162  | 0.197 |
|             | $R^2$          | 0.972 | 0.975 | 0.976 | 0.966 | 0.961 | 0.994 | 0.967  | 0.988 | 0.995 | 0.981  | 0.989 | 0.992 | 0.974  | 0.973  | 0.951 |
|             | $\Delta q, \%$ | 0.548 | 0.605 | 2.405 | 0.613 | 0.100 | 0.373 | 1.456  | 1.109 | 0.476 | 0.561  | 1.062 | 0.394 | 0.543  | 0.073  | 1.506 |
| ID          | $k_{id}$       | 11.47 | 15.80 | 19.78 | 7.147 | 11.19 | 13.51 | 5.105  | 7.674 | 9.201 | 3.207  | 5.634 | 7.556 | 2.181  | 4.552  | 6.035 |
|             | $R^2$          | 0.944 | 0.928 | 0.928 | 0.927 | 0.868 | 0.820 | 0.945  | 0.970 | 0.958 | 0.960  | 0.979 | 0.982 | 0.910  | 0.950  | 0.903 |
|             | $\Delta q, \%$ | 1.399 | 4.653 | 7.794 | 2.622 | 5.475 | 5.453 | 2.166  | 3.185 | 4.038 | 1.130  | 2.062 | 3.028 | 1.177  | 0.162  | 6.153 |
| ED          | $k_{ext}$      | 0.032 | 0.058 | 0.082 | 0.042 | 0.094 | 0.132 | 0.045  | 0.099 | 0.136 | 0.036  | 0.096 | 0.159 | 0.030  | 0.097  | 0.163 |
|             | $R^2$          | 0.975 | 0.692 | 0.842 | 0.987 | 0.576 | 0.569 | 0.975  | 0.867 | 0.827 | 0.973  | 0.829 | 0.812 | 0.975  | 0.853  | 0.846 |
|             | $\Delta q, \%$ | 3.101 | 9.030 | 18.06 | 2.086 | 8.860 | 10.16 | 2.353  | 5.206 | 11.01 | 3.874  | 13.34 | 5.080 | 4.285  | 10.35  | 17.54 |

Table S2. Kinetic data of Cr (III) removal using MTOP

| Model   | Parameter      | 4 g/L |       |       | 8 g/L |       |       | 12 g/L |       |       | 16 g/L |       |       | 20 g/L |       |       |
|---------|----------------|-------|-------|-------|-------|-------|-------|--------|-------|-------|--------|-------|-------|--------|-------|-------|
|         |                | 0.91  | 1.78  | 2.72  | 0.91  | 1.78  | 2.72  | 0.91   | 1.78  | 2.72  | 0.91   | 1.78  | 2.72  | 0.91   | 1.78  | 2.72  |
| PFO     | $q_{\max}$     | 25.02 | 36.29 | 45.06 | 56.28 | 31.81 | 31.06 | 23.33  | 28.83 | 30.17 | 9.212  | 14.50 | 16.00 | 8.536  | 11.43 | 12.06 |
|         | $k_1$          | 0.321 | 0.191 | 0.250 | 0.055 | 0.152 | 0.260 | 0.137  | 0.154 | 0.126 | 0.430  | 0.381 | 0.516 | 0.329  | 0.336 | 0.257 |
|         | $R^2$          | 0.997 | 0.997 | 0.975 | 0.994 | 0.999 | 0.893 | 0.996  | 0.998 | 0.986 | 0.962  | 0.996 | 0.861 | 0.990  | 0.964 | 0.853 |
|         | $\Delta q, \%$ | 2.248 | 7.453 | 0.385 | 68.78 | 11.99 | 1.886 | 18.46  | 17.65 | 24.22 | 1.623  | 11.61 | 1.133 | 2.615  | 11.61 | 24.34 |
| PSO     | $q_{\max}$     | 24.01 | 30.01 | 42.69 | 20.01 | 35.01 | 32.69 | 18.01  | 23.02 | 19.69 | 10.01  | 13.02 | 15.69 | 8.905  | 10.03 | 11.69 |
|         | $k_2$          | 0.030 | 0.017 | 0.012 | 0.021 | 0.022 | 0.012 | 0.014  | 0.013 | 0.022 | 0.071  | 0.081 | 0.022 | 0.101  | 0.109 | 0.040 |
|         | $R^2$          | 0.941 | 0.907 | 0.876 | 0.836 | 0.875 | 0.800 | 0.954  | 0.944 | 0.868 | 0.967  | 0.879 | 0.737 | 0.930  | 0.882 | 0.712 |
|         | $\Delta q, \%$ | 0.628 | 0.041 | 0.150 | 1.979 | 16.75 | 0.160 | 5.633  | 6.961 | 11.10 | 1.490  | 9.563 | 0.319 | 4.834  | 9.563 | 24.67 |
| Elovich | $\alpha$       | 19.40 | 17.98 | 21.79 | 9.498 | 12.90 | 14.03 | 8.992  | 10.42 | 8.992 | 12.25  | 12.46 | 6.259 | 7.367  | 11.33 | 5.314 |
|         | $\beta$        | 0.129 | 0.094 | 0.054 | 0.117 | 0.113 | 0.061 | 0.170  | 0.137 | 0.111 | 0.409  | 0.220 | 0.108 | 0.398  | 0.320 | 0.139 |
|         | $R^2$          | 0.999 | 0.989 | 0.988 | 0.972 | 0.985 | 0.969 | 0.976  | 0.985 | 0.996 | 0.986  | 0.985 | 0.981 | 0.991  | 0.976 | 0.967 |
|         | $\Delta q, \%$ | 0.179 | 0.784 | 0.036 | 0.442 | 0.977 | 0.102 | 1.783  | 0.566 | 1.152 | 0.492  | 2.623 | 0.542 | 0.086  | 2.623 | 23.89 |
| ID      | $k_{id}$       | 8.541 | 9.730 | 14.16 | 6.301 | 7.546 | 10.25 | 5.168  | 6.165 | 6.232 | 3.416  | 5.074 | 4.791 | 3.227  | 36.88 | 4.009 |
|         | $R^2$          | 0.994 | 0.980 | 0.857 | 0.909 | 0.965 | 0.877 | 0.964  | 0.960 | 0.826 | 0.980  | 0.953 | 0.801 | 0.986  | 0.982 | 0.832 |
|         | $\Delta q, \%$ | 1.470 | 0.353 | 0.173 | 3.525 | 1.101 | 14.49 | 5.858  | 0.787 | 2.106 | 0.727  | 4.532 | 5.852 | 6.084  | 4.532 | 25.16 |
| ED      | $k_{ext}$      | 0.030 | 0.034 | 0.057 | 0.049 | 0.058 | 0.091 | 0.062  | 0.076 | 0.081 | 0.052  | 0.086 | 0.084 | 0.056  | 0.080 | 0.089 |
|         | $R^2$          | 0.847 | 0.835 | 0.979 | 0.894 | 0.876 | 0.977 | 0.885  | 0.882 | 0.982 | 0.765  | 0.822 | 0.942 | 0.862  | 0.837 | 0.958 |
|         | $\Delta q, \%$ | 4.777 | 4.918 | 0.350 | 1.231 | 3.529 | 12.38 | 2.245  | 3.398 | 0.935 | 4.811  | 8.661 | 1.516 | 6.236  | 8.661 | 23.97 |

Table S3. Kinetic data of Cr (III) removal using OPTmW

| Model   | Parameter      | 4 g/L |       |       | 8 g/L |       |       | 12 g/L |       |       | 16 g/L |       |       | 20 g/L |       |       |
|---------|----------------|-------|-------|-------|-------|-------|-------|--------|-------|-------|--------|-------|-------|--------|-------|-------|
|         |                | 0.91  | 1.78  | 2.72  | 0.91  | 1.78  | 2.72  | 0.91   | 1.78  | 2.72  | 0.91   | 1.78  | 2.72  | 0.91   | 1.78  | 2.72  |
| PPO     | $q_{\max}$     | 15.69 | 24.63 | 39.51 | 10.95 | 19.52 | 30.60 | 8.156  | 16.86 | 23.94 | 8.626  | 15.08 | 13.16 | 9.919  | 13.94 | 11.58 |
|         | $k_1$          | 0.544 | 0.246 | 0.207 | 0.240 | 0.343 | 0.183 | 0.619  | 0.346 | 0.150 | 0.296  | 0.172 | 0.260 | 0.171  | 0.170 | 0.263 |
|         | $R^2$          | 0.980 | 0.996 | 0.989 | 0.979 | 0.999 | 0.954 | 0.987  | 0.994 | 0.992 | 0.986  | 0.993 | 0.902 | 0.995  | 0.993 | 0.901 |
|         | $\Delta q, \%$ | 0.309 | 4.772 | 12.34 | 2.099 | 1.871 | 8.286 | 0.244  | 2.138 | 20.97 | 4.018  | 12.26 | 0.827 | 14.84  | 8.853 | 0.667 |
| PSO     | $q_{\max}$     | 15.69 | 25.01 | 31.01 | 10.69 | 25.72 | 25.01 | 8.690  | 16.83 | 15.01 | 6.690  | 12.01 | 14.01 | 7.000  | 10.01 | 10.01 |
|         | $k_2$          | 0.081 | 0.018 | 0.020 | 0.043 | 0.012 | 0.017 | 0.129  | 0.048 | 0.044 | 0.204  | 0.039 | 0.028 | 0.089  | 0.059 | 0.066 |
|         | $R^2$          | 0.956 | 0.963 | 0.868 | 0.945 | 0.998 | 0.802 | 0.981  | 0.914 | 0.817 | 0.824  | 0.889 | 0.814 | 0.847  | 0.841 | 0.710 |
|         | $\Delta q, \%$ | 0.321 | 5.486 | 0.911 | 1.762 | 15.44 | 0.672 | 2.933  | 2.044 | 2.066 | 6.048  | 1.483 | 1.779 | 1.545  | 2.372 | 6.089 |
| Elovich | $\alpha$       | 28.01 | 15.41 | 17.61 | 7.312 | 15.56 | 11.27 | 17.82  | 12.92 | 8.263 | 6.841  | 6.515 | 6.007 | 4.163  | 5.860 | 5.277 |
|         | $\beta$        | 0.253 | 0.135 | 0.072 | 0.323 | 0.156 | 0.079 | 0.510  | 0.184 | 0.132 | 0.398  | 0.222 | 0.147 | 0.332  | 0.237 | 0.163 |
|         | $R^2$          | 0.996 | 0.992 | 0.995 | 0.971 | 0.998 | 0.973 | 0.995  | 0.988 | 0.998 | 0.986  | 0.984 | 0.965 | 0.996  | 0.989 | 0.975 |
|         | $\Delta q, \%$ | 0.726 | 0.161 | 0.532 | 0.179 | 0.714 | 0.031 | 0.202  | 0.023 | 0.227 | 0.157  | 0.564 | 1.078 | 0.044  | 0.004 | 0.456 |
| ID      | $k_{id}$       | 6.117 | 7.434 | 11.09 | 3.304 | 6.812 | 8.125 | 3.245  | 5.739 | 5.551 | 2.839  | 3.823 | 4.339 | 3.504  | 3.503 | 3.840 |
|         | $R^2$          | 0.954 | 0.991 | 0.957 | 0.987 | 0.993 | 0.947 | 0.923  | 0.960 | 0.944 | 0.995  | 0.956 | 0.970 | 0.953  | 0.952 | 0.946 |
|         | $\Delta q, \%$ | 4.534 | 1.147 | 0.730 | 0.213 | 4.620 | 10.38 | 6.110  | 12.10 | 0.419 | 1.564  | 1.288 | 4.103 | 20.80  | 0.195 | 3.749 |
| ED      | $k_{ext}$      | 0.021 | 0.025 | 0.043 | 0.023 | 0.049 | 0.068 | 0.034  | 0.068 | 0.070 | 0.042  | 0.059 | 0.074 | 0.048  | 0.071 | 0.084 |
|         | $R^2$          | 0.604 | 0.876 | 0.934 | 0.888 | 0.813 | 0.992 | 0.553  | 0.833 | 0.979 | 0.870  | 0.961 | 0.985 | 0.966  | 0.959 | 0.983 |
|         | $\Delta q, \%$ | 9.610 | 7.523 | 6.566 | 11.02 | 8.811 | 9.180 | 11.02  | 9.034 | 4.064 | 6.560  | 5.763 | 1.271 | 0.094  | 5.383 | 0.631 |

**Table S4.** Linear regression of the adjust of the data that are part of the external transport process.

| WTOP               |               |              |                |               |              |                |               |              |                |
|--------------------|---------------|--------------|----------------|---------------|--------------|----------------|---------------|--------------|----------------|
| $C_{ads}$ ,<br>g/L | 0.91          |              |                | 1.78          |              |                | 2.72          |              |                |
|                    | $k_{externa}$ | Ln ( $C_0$ ) | R <sup>2</sup> | $k_{externa}$ | Ln ( $C_0$ ) | R <sup>2</sup> | $k_{externa}$ | Ln ( $C_0$ ) | R <sup>2</sup> |
| 4                  | -0.0339       | 6.3910       | 0.9827         | -0.1097       | 6.3908       | 0.9977         | -0.0394       | 6.3962       | 0.9995         |
| 8                  | -0.0456       | 6.3964       | 0.9827         | -0.1545       | 6.2227       | 0.9964         | -0.0447       | 6.3955       | 0.9887         |
| 12                 | -0.0498       | 6.3903       | 0.9827         | -0.1292       | 6.1918       | 0.9599         | -0.0576       | 6.3982       | 0.9994         |
| 16                 | -0.0399       | 6.3908       | 0.9827         | -0.1428       | 6.2222       | 0.9965         | -0.0411       | 6.3921       | 0.9814         |
| 20                 | -0.0231       | 6.3966       | 0.9827         | -0.0875       | 6.1981       | 0.9526         | -0.0306       | 6.3973       | 0.9998         |
| MTOP               |               |              |                |               |              |                |               |              |                |
| 4                  | -0.0484       | 6.2105       | 0.9905         | -0.0397       | 6.2046       | 0.9772         | -0.0632       | 6.2121       | 0.9992         |
| 8                  | -0.0523       | 6.2206       | 0.99830        | -0.0638       | 6.2073       | 0.9963         | -0.0898       | 6.2297       | 0.9870         |
| 12                 | -0.0720       | 6.2091       | 0.9923         | -0.0829       | 6.2115       | 0.9992         | -0.0937       | 6.2328       | 0.9827         |
| 16                 | -0.0626       | 6.1975       | 0.9091         | -0.1144       | 6.1959       | 0.9894         | -0.0745       | 6.2295       | 0.9763         |
| 20                 | -0.0768       | 6.1955       | 0.9234         | -0.0839       | 6.1950       | 0.9616         | -0.0475       | 6.2071       | 0.9663         |
| OPTmW              |               |              |                |               |              |                |               |              |                |
| 4                  | -0.0271       | 6.2098       | 0.9900         | -0.0303       | 6.2037       | 0.9645         | -0.0501       | 6.2147       | 0.9881         |
| 8                  | -0.0220       | 6.2044       | 0.9403         | -0.0642       | 6.1957       | 0.9759         | -0.0647       | 6.2177       | 0.9983         |
| 12                 | -0.0494       | 6.2042       | 0.9738         | -0.0961       | 6.2057       | 0.9966         | -0.0785       | 6.2217       | 0.9950         |
| 16                 | -0.0516       | 6.2128       | 0.9825         | -0.0666       | 6.2114       | 0.9990         | -0.0658       | 6.2145       | 0.9986         |
| 20                 | -0.0573       | 6.2172       | 0.9957         | -0.0784       | 6.2140       | 0.9984         | -0.0767       | 6.2210       | 0.9961         |

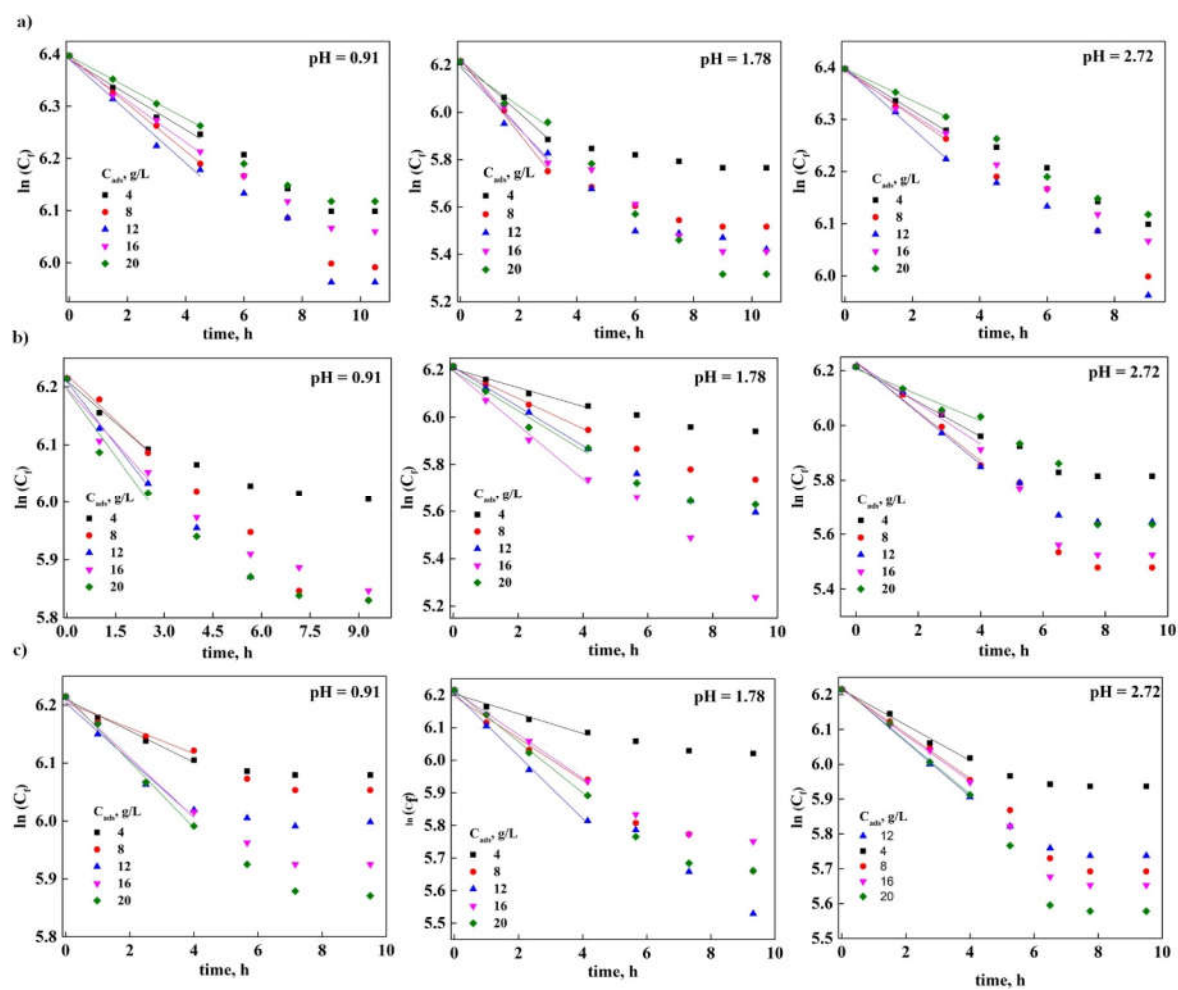

**Figure S2.** Analysis of internal mass transport with different pH a) WTOP, b) MTOP y c) OPTmW.

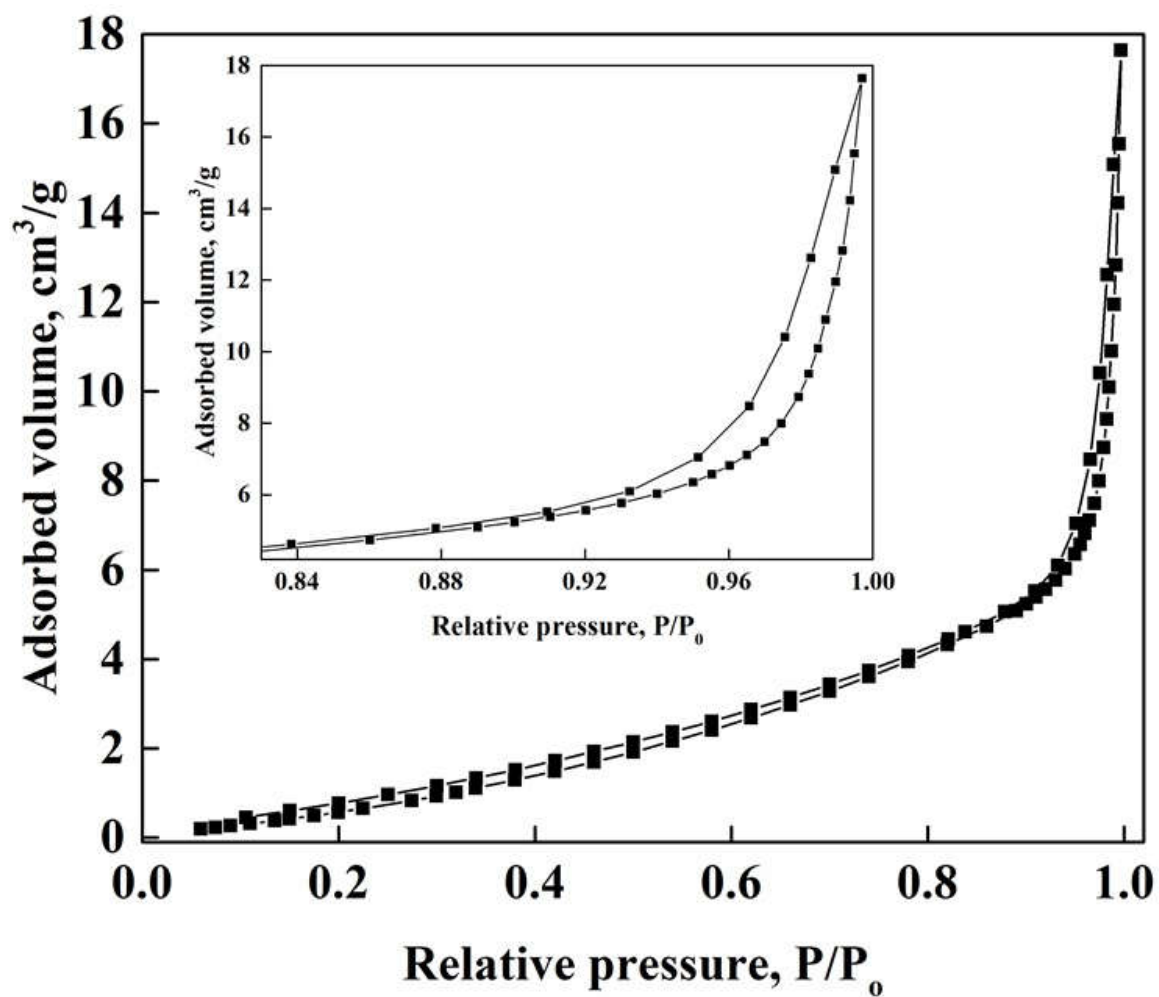

Figure S3. Adsorption-Desorption Isotherm of WTOP.

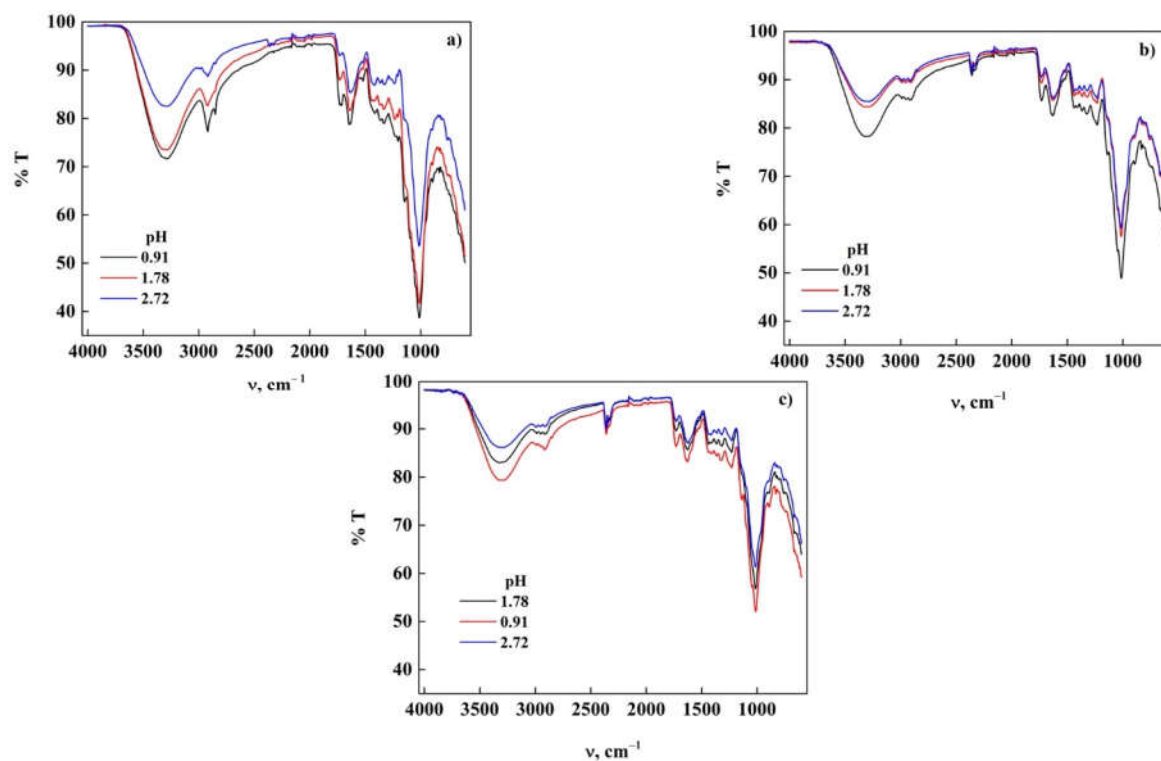

**Figure S4.** FT-IR spectra of OP in Cr (III) adsorption with different treatments: a) WTOP, b) MTOP y c) OPTmW.
